1 **A protein-trap allele reveals roles for *Drosophila* ATF4**  
2 **in photoreceptor degeneration, oocyte maturation and**  
3 **wing development**

4

5

6

7 Deepika Vasudevan<sup>1,2,\*</sup>, Hidetaka Katow<sup>1</sup>, Grace Tang<sup>1</sup>, Hyung Don Ryoo<sup>1,\*</sup>

8

9

10 <sup>1</sup>Department of Cell Biology, New York University Grossman School of Medicine,  
11 New York, NY 10016

12

13 <sup>2</sup>Current address: Department of Cell Biology, University of Pittsburgh, Pittsburgh, PA

14

15 \*Corresponding authors: [hyungdon.ryoo@nyumc.org](mailto:hyungdon.ryoo@nyumc.org)

16

Deepika.vasudevan@pitt.edu

17

18

19

20

21 Keywords: ATF4, crc, ER stress, UPR, Retinitis pigmentosa, adRP, retinal degeneration

22

23 **Abstract**

24 Metazoans have evolved various stress response mechanisms to cope with cellular  
25 stress inflicted by external and physiological conditions. The Integrated Stress Response  
26 (ISR) is an evolutionarily conserved pathway that mediates adaptation to cellular stress  
27 via the transcription factor, ATF4. Loss of function of *Drosophila* ATF4, encoded by the  
28 gene *cryptocephal* (*crc*), results in lethality during pupal development. The roles of *crc* in  
29 *Drosophila* disease models and adult tissue homeostasis thus remain poorly understood.  
30 Here, we report that a protein-trap MiMIC insertion in the *crc* locus generates a *crc*-GFP  
31 fusion protein that allows visualization of *crc* activity in vivo, and acts as a hypomorphic  
32 mutant that uncovers previously unknown roles for *crc*. Specifically, the *crc* protein-trap  
33 line shows *crc*-GFP induction in a *Drosophila* model for Retinitis Pigmentosa (RP). This  
34 *crc* allele renders photoreceptors more vulnerable to age-dependent retinal degeneration.  
35 *crc* mutant adult animals also show greater susceptibility to amino acid deprivation and  
36 reduced levels of known *crc* transcriptional targets. Furthermore, this mutant allele shows  
37 defects in wing veins and oocyte maturation, uncovering previously unknown roles for *crc*  
38 in the development of these tissues. Together, our data establish physiological and  
39 pathological functions of *crc*-mediated ISR in adult *Drosophila* tissues.

40

## 41 **Introduction**

42 Virtually all organisms have evolved stress response mechanisms to mitigate the impact  
43 of homeostatic imbalance. The Integrated Stress Response (ISR) pathway, conserved  
44 from yeast to humans, is one such mechanism initiated by stress-responsive eIF2 $\alpha$   
45 kinases. ISR pathway has been linked to the etiology of a number of human diseases  
46 including neurodegenerative disorders, diabetes, and atherosclerosis, amongst others  
47 (Chan et al. 2016; Ivanova and Orekhov 2016; Back et al. 2012; Ma et al. 2013). There  
48 is thus significant interest in better understanding the ISR signaling pathway.

49 Each ISR kinase responds to a different type of stress: PERK, an ER-resident  
50 kinase, responds to disruption in endoplasmic reticulum (ER) homeostasis (e.g.  
51 misfolding proteins, calcium flux); GCN2, a cytoplasmic kinase, responds to amino acid  
52 deprivation; PKR, a cytoplasmic kinase, responds to double stranded RNA, and; HRI, a  
53 cytoplasmic kinase, that responds to oxidative stress (Donnelly et al. 2013). When  
54 activated by the corresponding cellular stress, the ISR kinases phosphorylate the same  
55 downstream target: the  $\alpha$ -subunit of the initiator methionyl-tRNA (Met-tRNA<sub>i</sub><sup>Met</sup>) carrying  
56 complex, eIF2. Such phosphorylation of eIF2 $\alpha$  kinases leads to decreased availability in  
57 Met-tRNA<sub>i</sub><sup>Met</sup> resulting in lowered cellular translation (Sonenberg and Hinnebusch 2009).  
58 However, the translation of some mRNAs with unusual 5' leader arrangements, such as  
59 the one encoding the ISR transcription factor ATF4, is induced even under such inhibitory  
60 conditions (Hinnebusch et al. 2016). ATF4 is a bZIP (basic Leucine Zipper) transcription  
61 factor that induces the expression of stress response genes, including those involved in  
62 protein folding chaperones, amino acid transporters, antioxidant genes (Back et al. 2009;  
63 Han et al. 2013; Fusakio et al. 2016; Shan et al. 2016).

64           The number of ISR kinases varies depending on organismal complexity, e.g.  
65 GCN2 in yeast, GCN2 and PERK in *Caenorhabditis elegans* (worms) and *Drosophila*  
66 *melanogaster* (flies), and all four ISR kinases in *Danio rerio* (zebrafish) and other higher  
67 vertebrates (Ryoo 2015; Mitra and Ryoo 2019). ATF4 remains the best-characterized  
68 transcription factor that is induced downstream of these kinases (Donnelly et al. 2013),  
69 and *Drosophila* has a functionally conserved ortholog referred to as *cryptocephal* (*crc*)  
70 (Fristrom 1965; Hewes et al. 2000). In addition to its well-characterized roles during  
71 cellular stress, a plethora of studies have demonstrated roles for ISR signaling  
72 components during organismal development (Pakos-Zebrucka et al. 2016; Mitra and  
73 Ryoo 2019). In *Drosophila*, both *Gcn2* and *Perk* mutants survive to adulthood (Kang et  
74 al. 2017; Vasudevan et al. 2020), and the emerging adults show phenotypes in the gut,  
75 wings and female ovaries (Wang et al., 2015; Armstrong et al. 2014; Malzer et al. 2018).  
76 On the other hand, *crc* mutants fail to reach adulthood (Fristrom 1965; Hewes et al. 2000).  
77 The *crc* hypomorphic point mutant, *crc*<sup>1</sup>, which causes a single amino acid change, results  
78 in delayed larval development and subsequent pupal lethality (Fristrom 1965; Hewes et  
79 al. 2000; Vasudevan et al. 2020). The most striking phenotype of the *crc*<sup>1</sup> mutants is the  
80 failure to evert the adult head during pupariation, along with a failure to elongate their  
81 wings and legs (Fristrom 1965; Hewes et al. 2000; Vasudevan et al. 2020; Hewes et al.  
82 2000; Gauthier et al. 2012).

83           The larval and pupal lethality of known *crc* alleles have however limited our  
84 understanding of *crc*'s roles in adult tissues. *crc* is cytogenetically close to the widely used  
85 FRT40 element, which has impeded efforts to study this mutation using FRT-mediated  
86 mitotic clones. Here, we report that a GFP protein-trap reporter allele in the *crc* locus acts

87 as a hypomorphic mutant that survives to adulthood. We use this allele to discover that  
88 loss of *crc* results in accelerated retinal degeneration in a *Drosophila* model of autosomal  
89 dominant retinitis pigmentosa (adRP), a human disease whose etiology is linked to ER  
90 stress. Adult *crc* mutants show increased susceptibility to amino acid deprivation,  
91 consistent with what was previously known for GCN2. Additionally, we observe several  
92 developmental defects in adult tissues, including reduced female fertility due to a block in  
93 oogenesis. We also observe wing vein defects and overall reduced wing size in both male  
94 and female *crc* mutants.

95

## 96 **Results**

### 97 ***crc*<sup>GFSTF</sup> is a faithful reporter for endogenous *crc* levels**

98 In seeking endogenous reporters of *crc* activity, we examined a “protein trap” line for *crc*  
99 generated as part of the Gene Disruption Project (Nagarkar-Jaiswal, DeLuca, et al. 2015;  
100 Nagarkar-Jaiswal, Lee, et al. 2015; Venken et al. 2011). The protein trap line is based on  
101 a MiMIC (Minos Mediated Integration Cassette) element inserted randomly into various  
102 regions in the *Drosophila* genome. The cassette can be subsequently replaced with an  
103 EGFP-FIAsH-StrepII-TEV-3xFlag (GFSTF) multi-tag cassette using recombination  
104 mediated cassette exchange. One such insertion recovered through this project is in the  
105 intronic region of the *Drosophila* *crc* locus, which has been subsequently replaced with  
106 an EGFP-FIAsH-StrepII-TEV-3xFlag (GFSTF) multi-tag cassette using recombination  
107 mediated cassette exchange (Fig. 1). The splice donor and acceptor sequences flanking  
108 the cassette ensure that the GFSTF multi-tag is incorporated in the coding sequence of  
109 most abundantly expressed *crc* splice isoform, *crc*-RA (Hewes et al. 2000), to generate a

110 multi-tag *crc* fusion protein (Fig. 1). Henceforth, this *crc* reporter allele is referred to as  
111 *crc*<sup>GFSTF</sup>, with the encoded fusion protein referred to as *crc*-GFP.

112 Our lab and others have utilized acute misexpression of Rh1<sup>G69D</sup>, an ER stress-  
113 imposing mutant protein, in third instar larval eye disc tissues using a *GMR-Gal4* driver  
114 (*GMR>Rh1*<sup>G69D</sup>) as a facile method to activate the *Perk-crc* pathway (Ryoo et al. 2007;  
115 Kang et al. 2015; Kang et al. 2017). We tested the utility of *crc*<sup>GFSTF</sup> allele as an  
116 endogenous reporter for *crc* levels, and found robust induction of *crc*-GFP in third instar  
117 larval eye discs specifically in response to misexpression of Rh1<sup>G69D</sup> protein but not  
118 control lacZ protein in the *crc*<sup>GFSTF/+</sup> background (Fig. 2a, b). To validate that such  
119 induction was downstream of PERK activation by misfolding Rh1<sup>G69D</sup>, we generated *Perk*  
120 mutant FRT clones negatively marked by DsRed expression in the GMR compartment  
121 using ey-FLP. While control clones showed no change in the induction of *crc*-GFP (Fig.  
122 2c), *Perk*<sup>e01744</sup> mutant clones showed a complete loss of *crc*-GFP in *GMR>Rh1*<sup>G69D</sup> eye  
123 imaginal discs (Fig. 2d). We also validated these observations in whole animal *Perk*<sup>e01744</sup>  
124 mutants, where we observed a complete loss of *crc*-GFP in *GMR>Rh1*<sup>G69D</sup> eye imaginal  
125 discs (Fig. S1a, b).

126 Since the induction of *crc* in response to PERK activation occurs due to eIF2 $\alpha$   
127 phosphorylation (Sonenberg and Hinnebusch 2009), we examined whether *crc*-GFP  
128 induction we observed in Fig. 2a-d similarly occurs through this mechanism. Specifically,  
129 we generated a phospho-mimetic transgenic line where the Ser51 in eIF2 $\alpha$  is mutated to  
130 Asp51 (*UAS-eIF2 $\alpha$* <sup>S51D</sup>). We also generated a corresponding control transgenic line  
131 containing wild type eIF2 $\alpha$  (*UAS-eIF2 $\alpha$* <sup>WT</sup>). We next expressed these transgenes in flies  
132 containing *crc*<sup>GFSTF</sup>. While *GMR>eIF2 $\alpha$* <sup>WT</sup> discs showed no detectable levels of *crc*-GFP,

133 we found that *GMR>eIF2 $\alpha$ <sup>S51D</sup>* led to robust induction of *crc*-GFP in eye discs as detected  
134 by immunostaining with anti-GFP (Fig. 2e, f). These data demonstrate the applicability of  
135 *crc<sup>GFSTF</sup>* as a reliable reporter of endogenous *crc* expression downstream of ISR  
136 activation.

137

### 138 ***crc<sup>GFSTF</sup>* is a hypomorphic *crc* mutant allele**

139 Similar to the previously characterized *crc* hypomorphic mutant allele, *crc<sup>1</sup>*, we observed  
140 that flies homozygous for *crc<sup>GFSTF</sup>* exhibited a delay in head eversion and showed anterior  
141 defects (Fristrom 1965; Hewes et al. 2000). To further assess the effects of the *crc<sup>GFSTF</sup>*  
142 allele, we performed a lethal phase analysis of development starting at the first instar  
143 larval stage. We found that a little over 50% of *crc<sup>GFSTF</sup>* homozygotes were larval lethal  
144 (Fig. 3a), which is remarkably similar to larval lethality we previously reported for *crc<sup>1</sup>*  
145 (Vasudevan et al. 2020). However, unlike *crc<sup>1</sup>* homozygotes, only a small percentage of  
146 *crc<sup>GFSTF</sup>* homozygotes showed prepupal and pupal lethality, with ~30% of animals  
147 eclosing as adults (Fig. 3a). To ensure that these developmental defects cannot be  
148 attributed to background mutations in the *crc<sup>GFSTF</sup>*, we performed lethal phase analysis on  
149 *crc<sup>GFSTF</sup>* in transheterozygotic combination with the hypomorphic *crc<sup>1</sup>* allele. We found  
150 that *crc<sup>GFSTF</sup>/crc<sup>1</sup>* transheterozygotes showed similar levels of larval and pupal lethality to  
151 *crc<sup>GFSTF</sup>* homozygotes, with ~25% of animals surviving to adulthood (Fig. 3a). These data  
152 together suggested that the *crc<sup>GFSTF</sup>* allele may function as a *crc* loss-of-function allele.

153 To examine if *crc* transcript levels are affected in *crc<sup>GFSTF</sup>* mutants, we performed  
154 qPCR in the wandering 3<sup>rd</sup> instar larval stage when *crc* activity is known to be high in fat  
155 tissues (Kang et al. 2015; Kang et al. 2017). We found that *crc<sup>GFSTF</sup>* homozygotes show

156 ~65% decrease in *crc* transcript levels in comparison to control animals (Fig. 3b). We also  
157 tested *crc* activity by measuring mRNA levels of the well-characterized *crc* transcriptional  
158 target, *4E-BP* (*Drosophila Thor*). We observed ~40% lower levels of *Thor* in *crc*<sup>GFSTF</sup> in  
159 comparison to control animals (Fig. 3b). This reduction in transcript levels of *crc* targets  
160 was also reproducible *crc*<sup>GFSTF</sup>/*crc*<sup>1</sup> transheterozygotes (Fig. 3b). Taken together, these  
161 data indicate that *crc*<sup>GFSTF</sup> acts as a mild hypomorphic mutant allele of *crc*.

162

163 ***crc* has a protective role in age-related retinal degeneration and amino acid**  
164 **deprivation**

165 Nearly 30% of all adRP mutations are found in the Rhodopsin gene (Kaushal and Khorana  
166 1994; Illing et al. 2002). Several of these Rhodopsin mutations impose stress in the ER  
167 (Kroeger et al. 2019). However, the role of ATF4 in adRP has remained unclear, and we  
168 sought to resolve this using the *crc*<sup>GFSTF</sup> allele in a *Drosophila* model of adRP.

169 Clinically, adRP is characterized by age-related loss of peripheral vision, resulting  
170 in ‘tunnel vision’, and night blindness due to degeneration of rod photoreceptors (Kaushal  
171 and Khorana 1994). The *Drosophila* genome encodes several Rhodopsin genes,  
172 including *ninaE* that encodes the Rhodopsin-1 (Rh1) protein. The *ninaE*<sup>G69D</sup> mutation  
173 captures essential features of adRP etiology: Flies bearing one copy of the dominant  
174 *ninaE*<sup>G69D</sup> allele exhibit the age-related retinal degeneration as seen by photoreceptor cell  
175 death (Colley et al. 1995; Kurada and O’Tousa 1995). We found that *crc*<sup>GFSTF</sup>/*crc*<sup>1</sup>;  
176 *ninaE*<sup>G69D</sup>/+ animals exhibited rapid retinal degeneration in comparison to *crc*<sup>GFSTF</sup>/+;  
177 *ninaE*<sup>G69D</sup>/+ control animals, as monitored by pseudopupil structures in live flies over a  
178 time course of 30 days (Fig. 4a). While the earliest time point when control animals exhibit



179 retinal degeneration is typically 13-15 days, *crc* homozygous mutant animals exhibited  
180 retinal degeneration as early as 2 days, with all animals displaying loss of pseudopupil  
181 structures by day 14 (Fig. 4a). Interestingly, we also found that *crc*<sup>GFSTF</sup>/*crc*<sup>1</sup> animals  
182 exhibited age-dependent retinal degeneration even in the absence of *ninaE*<sup>G69D</sup>,  
183 indicating a protective role for *crc* in photoreceptors under physiological conditions during  
184 aging (Fig. 4a).

185 To measure the expression of *crc* in aging photoreceptors, we performed western  
186 blotting of adult fly heads from young and old (2-week) flies to detect *crc*-GFP. While  
187 young control flies (*crc*<sup>GFSTF/+</sup>) showed very low levels of *crc*-GFP, flies bearing one copy  
188 of *ninaE*<sup>G69D</sup> showed a substantial induction of *crc*-GFP (Fig. 4b, c). We observed that  
189 *crc*-GFP increases with age in both 2-week old control flies (*crc*<sup>GFSTF/+</sup>), with a  
190 concomitant increase in *crc*-GFP in *ninaE*<sup>G69D/+</sup> flies as well (Fig. 4b, c). These data  
191 substantiate the engagement of *crc* in photoreceptors in response to ER stress inflicted  
192 by the ER stress-imposing Rh1<sup>G69D</sup>, thus providing a basis for the protective roles of *Perk*  
193 in retinal degeneration.

194 In addition to rendering a protective effect during ER stress inflicted by Rh1<sup>G69D</sup>,  
195 we also tested if *crc* had an effect during amino acid deprivation in adult animals. We  
196 tested this by subjecting *crc*<sup>GFSTF/crc</sup><sup>1</sup> animals to amino acid deprivation by rearing  
197 animals on 5% sucrose-agar. While a majority of control animals survived up to 8 days,  
198 *crc*<sup>GFSTF/crc</sup><sup>1</sup> animals steadily succumbed to amino acid deprivation starting at day 2 with  
199 no survivors by day 6 (Fig. 4d). This is consistent with the idea that *crc* mediates the  
200 GCN2 response to amino acid deprivation in adult *Drosophila*.

201

202 ***crc* mutants show wing size and vein defects**

203 *crc*<sup>GFSTF</sup> provided an opportunity to examine previously unreported roles for *crc* in adult  
204 flies. We first observed that wings from both *crc*<sup>GFSTF</sup> homozygotes and *crc*<sup>GFSTF</sup>/*crc*<sup>1</sup>  
205 transheterozygotes showed a range of venation defects (Fig. 5a-c). The *Drosophila* wing  
206 has five longitudinal veins (annotated L1-L5) and two cross veins, anterior and posterior,  
207 ACV and PCV respectively (Fig. 5a). Severe wing defects in *crc*<sup>GFSTF</sup> homozygous female  
208 and male flies were characterized by ectopic venation on L2, between L3 and L4, on L5,  
209 and also ectopic cross veins adjacent to the PCV (Fig. 5b, b'). *crc*<sup>GFSTF</sup>/*crc*<sup>1</sup>  
210 transheterozygotes largely showed milder wing defects, characterized by ectopic  
211 venation on the PCV and on L5 (Fig. 5c, c'). We quantified these wing phenotypes in over  
212 forty animals of each sex and found that the penetrance and severity of the phenotypes  
213 were much stronger in females than in males (Fig. 5d). We also observed that *crc* mutant  
214 wings were smaller than in control animals (Fig. 5a-c). Quantification of wing area from  
215 animals of each sex revealed a statistically significant decrease in wing blade size in  
216 *crc*<sup>GFSTF</sup> and *crc*<sup>GFSTF</sup>/*crc*<sup>1</sup> males and females (Fig. 5e). To exclude the possibility of  
217 dominant negative effects of *crc*<sup>GFSTF</sup>, we also tested wings from *crc*<sup>GFSTF</sup>/+ heterozygotes  
218 but found no wing defects in these animals (Fig. S2). It is notable that *Gcn2* depletion in  
219 the wing reportedly causes venation defects (Malzer et al. 2018). Thus, our results  
220 suggest that *Gcn2*-mediated *crc* activation is involved in proper wing vein development.

221

222 ***crc* mutants exhibit decreased fertility due to defects in oogenesis**

223 In trying to establish a stock of *crc*<sup>GFSTF</sup>, we observed that when mated to each other  
224 *crc*<sup>GFSTF</sup> homozygotic males and females produced no viable progeny with very few of the

225 eggs laid hatched to first instar larvae. To determine if this loss of fertility in *crc*<sup>GFSTF</sup> is  
226 due to loss of fertility in males, females or both, we separately mated *crc* mutant females  
227 to healthy control (genotype; *yw*) males and vice versa. We observed that while *crc*<sup>GFSTF</sup>  
228 and *crc*<sup>GFSTF</sup>/*crc*<sup>1</sup> males produced viable progeny at similar rates to control *yw* males (data  
229 not shown), *crc* mutant females showed ~50% reduction in egg laying in comparison to  
230 control females (Fig. 6a), again with very few of the eggs laid hatching to first instar larvae.  
231 Upon closer observation, we saw defects in the dorsal appendages of eggs laid by *crc*  
232 mutant females, with mild phenotypes such as shortening of the appendages to complete  
233 absence of one or both appendages (Fig. 6b). These data indicated that the fertility  
234 defects in *crc* mutants were due to the loss of *crc* function in female flies.

235 Dorsal appendages are specified and develop in the final stage of oogenesis. Each  
236 *Drosophila* ovary is comprised of 14-16 developing follicles called ovarioles, with germline  
237 stem cells residing at the anterior apex undergoing differentiation along the ovariole in  
238 individual egg chambers (Lobell et al. 2017). Each egg chamber represents a distinct  
239 stage in ovulation, with stage 14 representing a mature egg. To further dissect the dorsal  
240 appendage defects, we examined ovaries from *crc* mutant animals. We observed that  
241 ovaries from *crc*<sup>GFSTF</sup> and *crc*<sup>GFSTF</sup>/*crc*<sup>1</sup> were considerably swollen in comparison to  
242 control ovaries (Fig. S3a). Several ovarioles within *crc* mutant ovaries showed  
243 accumulation of stage 10 egg chambers, indicative of an arrest in oogenesis (yellow  
244 arrowheads in Fig. S3a). Indeed, examination of individual ovarioles from *crc* mutant  
245 ovaries counterstained for actin showed that loss of *crc* results in an abnormal  
246 arrangement of early stage egg chambers (Fig. 6c-e). While ovarioles from control  
247 animals showed sequentially staged and spaced egg chambers culminating in mature

248 stage 14 eggs (Fig. 6c), ovarioles from *crc*<sup>GFSTF</sup> and *crc*<sup>GFSTF</sup>/*crc*<sup>1</sup> appeared to be arrested  
249 in stage 10, with improper spacing between egg chambers in earlier stages (white  
250 arrowheads, Fig. 6d, e). We quantified the number of ovarioles that displayed such arrest  
251 and found that more than half of *crc* mutant ovarioles (~9) in each ovary showed stage  
252 10 arrest in comparison to an average of 2-3 ovarioles arrested in ovaries from  
253 corresponding control animals (Fig. 6f).

254 To determine if the arrested egg chambers underwent subsequent cell death, we  
255 immunostained ovaries with an antibody that detects proteolytically activated (cleaved)  
256 caspase, Dcp-1 (Vasudevan and Ryoo 2016). We observed that stage 10 egg chambers  
257 from several *crc*<sup>GFSTF</sup> and *crc*<sup>GFSTF</sup>/*crc*<sup>1</sup> ovarioles showed strong cleaved Dcp-1 staining  
258 (Fig. 6g-i). These data strongly suggest that the decrease in fertility in *crc*<sup>GFSTF</sup> and  
259 *crc*<sup>GFSTF</sup>/*crc*<sup>1</sup> females is associated with cell death in arrested egg chambers during  
260 oogenesis.

261 To examine which cell types express *crc* in the ovary, we immunostained ovaries  
262 with GFP antibody to detect *crc*-GFP. However, we were unable to detect *crc*-GFP in this  
263 tissue (Fig. S3b, c), suggesting that *crc* may regulate ovulation non-autonomously. We  
264 also attempted western blotting of ovary extracts to detect *crc*-GFP but did not observe  
265 any detectable signal (data not shown). A previous study had suggested a non-  
266 autonomous role for fat body *Gcn2* in the regulation of oogenesis (Armstrong et al. 2014).  
267 Consistent with these observations, we were able to detect high levels of *crc*-GFP fusion  
268 protein in adult abdominal fat tissues from *crc*<sup>GFSTF</sup> animals (Fig. S3d,e). These data raise  
269 the possibility that *crc* mediates *Gcn2*-signaling in fat tissues to non-autonomously  
270 regulate oogenesis.

271

272 **Discussion**

273 ISR signaling is associated with various pathological conditions, but the role of *Drosophila*  
274 *crc* in adult tissues had remained unclear. This may be in part because the cytogenetic  
275 location of *crc* is very close to FRT40, and therefore, attempts to study *crc* function using  
276 conventional genetic mosaics have been unsuccessful. Thus far, our understanding of  
277 the role of *crc* in adult *Drosophila* tissues has entirely relied on RNAi experiments. Loss-  
278 of-function mutants, however, allow for unbiased discovery of developmental phenotypes,  
279 as is exemplified in our present study where we examined the role of *crc* in later  
280 developmental stages, adult tissues and during aging.

281       Generally, ER stress-imposing proteins such as Rh1<sup>G69D</sup> are thought to activate  
282 the PERK-mediated ISR response amongst other ER stress responses (Donnelly et al.  
283 2013). It is worth noting here that while both *Drosophila* and mouse models of adRP  
284 describe a protective role for *Perk* in retinal degeneration (Chiang et al. 2012; Athanasiou  
285 et al. 2017; Vasudevan et al. 2020), there has been conflicting evidence on the role of  
286 ATF4 in the mouse adRP model (Bhootada et al. 2016). In this study, we show that loss  
287 of *crc* accelerates the age-related retinal degeneration in a *Drosophila* model of adRP.  
288 As we have previously shown that *Perk* mutants similarly accelerate retinal degeneration  
289 in this model (Vasudevan et al. 2020), we interpret that *crc* mediates the effect of *Perk* in  
290 this model. Our data finds that loss of *crc* renders photoreceptor susceptible to retinal  
291 degeneration with age in otherwise wild type animals (solid red line, Fig. 4a). Along with  
292 our observation showing an increase in *crc* protein levels in older flies (Fig. 4b, c), these

293 data indicate that photoreceptors have physiological stress that requires *crc* for their  
294 survival during aging.

295 One of the visible phenotypes in adult *crc* mutants is ectopic wing venation (Fig.  
296 5). It has previously been demonstrated that *Gcn2* depletion in the posterior compartment  
297 of imaginal discs results in ectopic wing vein formation (Malzer et al. 2010). The study  
298 proposed that GCN2 regulates BMP signaling by modulating mRNA translation in wing  
299 discs via eIF2 $\alpha$  phosphorylation and 4E-BP induction. Our results are consistent with this  
300 proposal since 4E-BP is a transcription target of *crc*. In addition, we report here that *crc*  
301 loss affects wing size, a finding that has not been reported previously. Given that BMP  
302 signaling has also been extensively implicated in determining wing size (Gibson and  
303 Perrimon 2005; Shen and Dahmann 2005), it is possible that GCN2-*crc* signaling  
304 regulates wing size via BMP signaling. It is equally possible that GCN2-*crc* signaling  
305 affects tissue size through its role in regulating amino acid transport and metabolism  
306 through autonomous and non-autonomous means.

307 *Drosophila* fat body is an organ that orchestrates organismal metabolism in  
308 response to changes in nutrient availability. While wing development is not known to be  
309 sexually dimorphic, fat tissues are known to have sex-specific effects, with particularly  
310 profound effects on female fertility in flies and in all other sexually dimorphic organisms  
311 (Valencak et al. 2017). It has been previously demonstrated that loss of *crc* in *Drosophila*  
312 larvae leads to reduced fat content and increased starvation susceptibility (Seo et al.  
313 2009). Correlating with this, it had been found that starvation causes effector caspase  
314 activation and cell death during mid-oogenesis (McCall 2004; Hou et al., 2008; Jenkins  
315 et al., 2013). These observations prompt us to speculate that the caspase-mediated block

316 in oogenesis in *crc* mutants (Fig. 6) may be due to metabolic changes in the female fat  
317 body. This hypothesis integrates well with our data showing high *crc* activity in adult fat  
318 tissues (Fig. S3d, e) and observations from a previous study that amino acid sensing by  
319 GCN2 in *Drosophila* adult adipocytes regulates germ stem cells in the ovary (Armstrong  
320 et al. 2014). However, it remains possible that *crc* acts autonomously in the ovary but is  
321 undetectable using our current methods (Fig. S3b, c).

322 In summary, our study has found utilities for the *crc*<sup>GFSTF</sup> allele in discovering a  
323 new role for ISR signaling in disease models and during development, and as an  
324 endogenous reporter for ISR activation.

325

## 326 **Methods**

327

### 328 *Fly husbandry*

329 Flies were reared on cornmeal-molasses media at 25°C under standard conditions except  
330 for retinal degeneration experiments when they were reared under constant light. All fly  
331 genotypes and sources used in the study are listed in Table S1.

332

### 333 *Phenotype analysis*

334 Lethal phase analysis was performed as described previously (Vasudevan et al. 2020).  
335 Right wings were severed from 1-4 day old flies and imaged using a Nikon SMZ1500  
336 microscope outfitted with a Nikon 8MP camera with NIS-Elements software. Wing size  
337 was measured using regions of interest (ROI) feature in ImageJ software.

338 Female fertility was quantified by placing five 1-4 day old virgin females with five yw males  
339 in a vial containing standard media enhanced with yeast to encourage egg laying. After  
340 allowing a day for acclimatization, the flies were moved to a new vial and the number of  
341 eggs laid in a 24-hour period were counted and quantified. Eggs were imaged for [Fig. 5b](#)  
342 by placing them on an apple juice plate and captured with the Nikon SMZ1500 microscope  
343 outfitted with 8MP Nikon camera controlled by NIS elements software. Ovaries from  
344 female flies in this experiment were dissected in cold PBS and similarly imaged on apple  
345 juice plates for [Fig. S3a](#).

346

#### 347 qPCR analysis

348 Total RNA was prepared using TriZol (Invitrogen) from five wandering third instar larva,  
349 and cDNA was generated using random hexamers (Fisher Scientific) and Maxima H  
350 minus reverse transcriptase (Thermo Fisher) according to manufacturer's protocol. qPCR  
351 was performed using PowerSYBR Green Mastermix (Thermo Fisher) using the following  
352 primers

353 crc- Fwd: GGAGTGGCTGTATGACGATAAC

354 Rev: CATCACTAAGCAACTGGAGAGAA

355 Thor- Fwd: TAAGATGTCCGCTTCACCCA

356 Rev: CGTAGATAAGTTTGGTGCCTCC

357 Rpl15-Fwd: AGGATGCACTTATGGCAAGC

358 Rev: CCGCAATCCAATACGAGTTC

359

#### 360 Immunostaining



361 Ovaries and fat bodies were dissected in cold PBS from female flies reared for 2-3 days  
362 along with *yw* males on standard media enhanced with yeast. Tissues were fixed in 4%  
363 PFA in PBT (0.2% Triton-X 100, 1X PBS) for 30 minutes, washed 3x with PBT, and  
364 blocked in 1% BSA, PBT for 3 hours, all at room temperature. Tissues were stained  
365 overnight at 4°C with the primary antibodies diluted in PBT, following which they were  
366 washed 3X with PBT and incubated with AlexaFluor-conjugated secondary antibodies  
367 (Invitrogen) in PBT for 3 hours at room temperature. Tissues were mounted in 50%  
368 glycerol containing DAPI.

369 Eye imaginal discs were dissected from wandering 3<sup>rd</sup> instar larva in cold PBS and fixed  
370 in 4% PFA in PBS for 20 minutes, following which they were washed 2x with PBS and  
371 permeabilized in 1X PBT for 20 minutes, all at room temperature. Discs were incubated  
372 in primary antibodies diluted in PBT for 2 hours, washed 3x in PBT, incubated in  
373 AlexaFluor-conjugated secondary antibodies (Invitrogen) in PBT for 1 hour and washed  
374 3x in PBT prior to mounting in 50% glycerol containing DAPI.

375 Antibodies: Phalloidin-Alexa647 (1:1000, Invitrogen), chicken anti-GFP (1:500, Aves  
376 Labs), Rabbit anti-cleaved Dcp-1 (1:100, Cell Signaling), Mouse anti-4C5 for Rh1 (1:500,  
377 DSHB), Rabbit anti-eIF2 $\alpha$  (1:500, AbCam), rabbit anti-S51 p-eIF2 $\alpha$  (1:500, AbCam).

378 All images were obtained on a Zeiss LSM 700 confocal microscope with ZEN elements  
379 software and a 20X air or 40X water lens.

380

### 381 Retinal degeneration

382 All experiments were performed in a *white* mutant background since *crc*<sup>GFSTF</sup>, *crc*<sup>1</sup>, and  
383 *ninaE*<sup>G69D</sup>, do not have eye color. 0-3 day old male flies were placed (20 animals/vial)

384 under 1000-lumen light intensity, and their pseudopupil structures monitored under blue  
385 light at 3-day intervals for a 30-day period. Media was replaced every 3 days, and flies  
386 with disrupted pseudopupils in one or both eyes were marked as having retinal  
387 degeneration.

388

### 389 Western blotting

390 Fly head extracts were prepared from 6 severed male fly heads in 30  $\mu$ l lysis buffer  
391 containing 10mM Tris HCl (pH 7.5), 150mM NaCl, protease inhibitor cocktail (Roche),  
392 1mM EDTA, 1% SDS. Following SDS-PAGE and western blotting, proteins were detected  
393 using primary antibodies and IRDye-conjugated secondary antibodies (LI-COR) on the  
394 Odyssey system. Primary Rabbit anti-GFP (1:500, Invitrogen) and mouse anti-Tub  
395 (1:1000, DHSB).

396

### 397 Amino acid deprivation

398 0-3 day old female flies were placed (10 animals/vial) in standard media or in vials  
399 containing 5% sucrose, 2% agarose prepared in dH<sub>2</sub>O. The number of survivors was  
400 counted every 24 hours and survivors were moved to new media.

401

### 402 **Acknowledgements**

403 We thank Hugo Bellen's laboratory for making available the *crc* MIMIC RMCE line, and  
404 Drs. Lacy Barton and Lydia Grmai for discussions on the ovary phenotypes, and Drs.  
405 Erika Bach and Jessica Treisman and their laboratories for helpful discussions that  
406 improved this work. We thank the Bloomington Drosophila Stock Center (NIH

407 P40OD018537) for supplying many of the fly stocks, and FlyBase (U41 HG000739) for  
408 curating sequence data used in this study.

409

#### 410 **Contributions**

411 D.V. and H.D.R. conceptualized the project, analyzed the data, and wrote the manuscript.

412 H.K. performed all the wing phenotype analyses, G.T. executed all western blotting

413 experiments, and D.V. performed all other experiments.

414

#### 415 **Funding**

416 This project was supported by NIH R01 EY020866 and GM125954 to H.D.R., and

417 K99EY029013 to D.V.

418

#### 419 **Competing Interest**

420 None of the authors have competing interests to disclose.

421

422 **Bibliography**

423

424 Armstrong, A.R., Laws, K.M. and Drummond-Barbosa, D. 2014. Adipocyte amino acid  
425 sensing controls adult germline stem cell number via the amino acid response pathway  
426 and independently of Target of Rapamycin signaling in *Drosophila*. *Development*  
427 141(23), pp. 4479–4488.

428 Athanasiou, D., Aguila, M., Bellingham, J., Kanuga, N., Adamson, P. and Cheetham,  
429 M.E. 2017. The role of the ER stress-response protein PERK in rhodopsin retinitis  
430 pigmentosa. *Human Molecular Genetics* 26(24), pp. 4896–4905.

431 Back, S.H., Kang, S.-W., Han, J. and Chung, H.-T. 2012. Endoplasmic reticulum stress  
432 in the  $\beta$ -cell pathogenesis of type 2 diabetes. *Experimental diabetes research* 2012, p.  
433 618396.

434 Back, S.H., Scheuner, D., Han, J., et al. 2009. Translation attenuation through  
435 eIF2 $\alpha$  phosphorylation prevents oxidative stress and maintains the differentiated  
436 state in beta cells. *Cell Metabolism* 10(1), pp. 13–26.

437 Bhootada, Y., Kotla, P., Zolotukhin, S., et al. 2016. Limited ATF4 Expression in  
438 Degenerating Retinas with Ongoing ER Stress Promotes Photoreceptor Survival in a  
439 Mouse Model of Autosomal Dominant Retinitis Pigmentosa. *Plos One* 11(5), p.  
440 e0154779.

441 Chan, P., Stolz, J., Kohl, S., Chiang, W.-C. and Lin, J.H. 2016. Endoplasmic reticulum  
442 stress in human photoreceptor diseases. *Brain Research* 1648, pp. 538–541.

443 Chiang, W.-C., Hiramatsu, N., Messah, C., Kroeger, H. and Lin, J.H. 2012. Selective  
444 activation of ATF6 and PERK endoplasmic reticulum stress signaling pathways prevent

445 mutant rhodopsin accumulation. *Investigative Ophthalmology & Visual Science* 53(11),  
446 pp. 7159–7166.

447 Colley, N.J., Cassill, J.A., Baker, E.K. and Zuker, C.S. 1995. Defective intracellular  
448 transport is the molecular basis of rhodopsin-dependent dominant retinal degeneration.  
449 *Proceedings of the National Academy of Sciences of the United States of America*  
450 92(7), pp. 3070–3074.

451 Donnelly, N., Gorman, A.M., Gupta, S. and Samali, A. 2013. The eIF2 $\alpha$  kinases: their  
452 structures and functions. *Cellular and Molecular Life Sciences* 70(19), pp. 3493–3511.

453 Fristrom, J.W. 1965. Development of the morphological mutant cryptocephal of  
454 *Drosophila melanogaster*. *Genetics* 52(2), pp. 297–318.

455 Fusakio, M.E., Willy, J.A., Wang, Y., et al. 2016. Transcription factor ATF4 directs basal  
456 and stress-induced gene expression in the unfolded protein response and cholesterol  
457 metabolism in the liver. *Molecular Biology of the Cell* 27(9), pp. 1536–1551.

458 Gauthier, S.A., VanHaaften, E., Cherbas, L., Cherbas, P. and Hewes, R.S. 2012.  
459 Cryptocephal, the *Drosophila melanogaster* ATF4, is a specific coactivator for ecdysone  
460 receptor isoform B2. *PLoS Genetics* 8(8), p. e1002883.

461 Gibson, M.C. and Perrimon, N. 2005. Extrusion and death of DPP/BMP-compromised  
462 epithelial cells in the developing *Drosophila* wing. *Science* 307(5716), pp. 1785–1789.

463 Han, J., Back, S.H., Hur, J., et al. 2013. ER-stress-induced transcriptional regulation  
464 increases protein synthesis leading to cell death. *Nature Cell Biology* 15(5), pp. 481–  
465 490.

466 Hewes, R.S., Schaefer, A.M. and Taghert, P.H. 2000. The cryptocephal gene (ATF4)  
467 encodes multiple basic-leucine zipper proteins controlling molting and metamorphosis in

- 468 *Drosophila*. *Genetics* 155(4), pp. 1711–1723.
- 469 Hinnebusch, A.G., Ivanov, I.P. and Sonenberg, N. 2016. Translational control by 5'-  
470 untranslated regions of eukaryotic mRNAs. *Science* 352(6292), pp. 1413–1416.
- 471 Hou, Y.C.C., Chittaranjan, S., Barbosa, S.G., McCall, K., Gorski, S.M. 2008. Effector  
472 caspase Dcp-1 and IAP protein Bruce regulate starvation-induced autophagy during  
473 *Drosophila melanogaster* oogenesis. *J. Cell Biol.* 182(6), pp. 1127-1139.
- 474 Illing, M.E., Rajan, R.S., Bence, N.F. and Kopito, R.R. 2002. A rhodopsin mutant linked  
475 to autosomal dominant retinitis pigmentosa is prone to aggregate and interacts with the  
476 ubiquitin proteasome system. *The Journal of Biological Chemistry* 277(37), pp. 34150–  
477 34160.
- 478 Ivanova, E.A. and Orekhov, A.N. 2016. The role of endoplasmic reticulum stress and  
479 unfolded protein response in atherosclerosis. *International Journal of Molecular*  
480 *Sciences* 17(2).
- 481 Jenkins, V.K., Timmons, A.K., McCall, K. 2013. Diversity of cell death pathways: insight  
482 from the fly ovary. *Trends Cell Biol.* 23(11), pp 567-574.
- 483 Kang, K., Ryoo, H.D., Park, J.-E., Yoon, J.-H. and Kang, M.-J. 2015. A *Drosophila*  
484 Reporter for the Translational Activation of ATF4 Marks Stressed Cells during  
485 Development. *Plos One* 10(5), p. e0126795.
- 486 Kang, M.-J. and Ryoo, H.D. 2009. Suppression of retinal degeneration in *Drosophila* by  
487 stimulation of ER-associated degradation. *Proceedings of the National Academy of*  
488 *Sciences of the United States of America* 106(40), pp. 17043–17048.
- 489 Kang, M.-J., Vasudevan, D., Kang, K., et al. 2017. 4E-BP is a target of the GCN2-ATF4  
490 pathway during *Drosophila* development and aging. *The Journal of Cell Biology* 216(1),

491 pp. 115–129.

492 Kaushal, S. and Khorana, H.G. 1994. Structure and function in rhodopsin. 7. Point  
493 mutations associated with autosomal dominant retinitis pigmentosa. *Biochemistry*  
494 33(20), pp. 6121–6128.

495 Kroeger, H., Chiang, W.-C., Felden, J., Nguyen, A. and Lin, J.H. 2019. ER stress and  
496 unfolded protein response in ocular health and disease. *The FEBS Journal* 286(2), pp.  
497 399–412.

498 Kurada, P. and O'Tousa, J.E. 1995. Retinal degeneration caused by dominant  
499 rhodopsin mutations in *Drosophila*. *Neuron* 14(3), pp. 571–579.

500 Lobell, A.S., Kaspari, R.R., Serrano Negron, Y.L. and Harbison, S.T. 2017. The Genetic  
501 Architecture of Ovariole Number in *Drosophila melanogaster*: Genes with Major,  
502 Quantitative, and Pleiotropic Effects. *G3 (Bethesda, Md.)* 7(7), pp. 2391–2403.

503 Ma, T., Trinh, M.A., Wexler, A.J., et al. 2013. Suppression of eIF2 $\alpha$  kinases alleviates  
504 Alzheimer's disease-related plasticity and memory deficits. *Nature Neuroscience* 16(9),  
505 pp. 1299–1305.

506 Malzer, E., Daly, M.-L., Moloney, A., et al. 2010. Impaired tissue growth is mediated by  
507 checkpoint kinase 1 (CHK1) in the integrated stress response. *Journal of Cell Science*  
508 123(Pt 17), pp. 2892–2900.

509 Malzer, E., Dominicus, C.S., Chambers, J.E., Dickens, J.A., Mookerjee, S. and  
510 Marciniak, S.J. 2018. The integrated stress response regulates BMP signalling through  
511 effects on translation. *BMC Biology* 16(1), p. 34.

512 McCall, K. 2004. Eggs over easy: cell death in the *Drosophila* ovary. *Dev. Biol.* 274(1),  
513 p. 3-14.

514 Mitra, S. and Ryoo, H.D. 2019. The unfolded protein response in metazoan  
515 development. *Journal of Cell Science* 132(5).

516 Nagarkar-Jaiswal, S., DeLuca, S.Z., Lee, P.-T., et al. 2015. A genetic toolkit for tagging  
517 intronic MiMIC containing genes. *eLife* 4.

518 Nagarkar-Jaiswal, S., Lee, P.-T., Campbell, M.E., et al. 2015. A library of MiMICs allows  
519 tagging of genes and reversible, spatial and temporal knockdown of proteins in  
520 *Drosophila*. *eLife* 4.

521 Pakos-Zebrucka, K., Koryga, I., Mnich, K., Ljubic, M., Samali, A. and Gorman, A.M.  
522 2016. The integrated stress response. *EMBO Reports* 17(10), pp. 1374–1395.

523 Ryoo, H.D. 2015. *Drosophila* as a model for unfolded protein response research. *BMB*  
524 *Reports* 48(8), pp. 445–453.

525 Ryoo, H.D., Domingos, P.M., Kang, M.-J. and Steller, H. 2007. Unfolded protein  
526 response in a *Drosophila* model for retinal degeneration. *The EMBO Journal* 26(1), pp.  
527 242–252.

528 Seo, J., Fortunato, E.S., Suh, J.M., et al. 2009. Atf4 regulates obesity, glucose  
529 homeostasis, and energy expenditure. *Diabetes* 58(11), pp. 2565–2573.

530 Shan, J., Zhang, F., Sharkey, J., Tang, T.A., Örd, T. and Kilberg, M.S. 2016. The C/ebp-  
531 Atf response element (CARE) location reveals two distinct Atf4-dependent, elongation-  
532 mediated mechanisms for transcriptional induction of aminoacyl-tRNA synthetase genes  
533 in response to amino acid limitation. *Nucleic Acids Research* 44(20), pp. 9719–9732.

534 Shen, J. and Dahmann, C. 2005. Extrusion of cells with inappropriate Dpp signaling  
535 from *Drosophila* wing disc epithelia. *Science* 307(5716), pp. 1789–1790.

536 Sonenberg, N. and Hinnebusch, A.G. 2009. Regulation of translation initiation in



537 eukaryotes: mechanisms and biological targets. *Cell* 136(4), pp. 731–745.

538 Valencak, T.G., Osterrieder, A. and Schulz, T.J. 2017. Sex matters: The effects of  
539 biological sex on adipose tissue biology and energy metabolism. *Redox biology* 12, pp.  
540 806–813.

541 Vasudevan, D., Clark, N.K., Sam, J., et al. 2017. The GCN2-ATF4 Signaling Pathway  
542 Induces 4E-BP to Bias Translation and Boost Antimicrobial Peptide Synthesis in  
543 Response to Bacterial Infection. *Cell reports* 21(8), pp. 2039–2047.

544 Vasudevan, D., Neuman, S.D., Yang, A., et al. 2020. Translational induction of ATF4  
545 during integrated stress response requires noncanonical initiation factors eIF2D and  
546 DENR. *Nature Communications* 11(1), p. 4677.

547 Vasudevan, D. and Ryoo, H.D. 2016. Detection of cell death in drosophila tissues.  
548 *Methods in Molecular Biology* 1419, pp. 131–144.

549 Venken, K.J.T., Schulze, K.L., Haelterman, N.A., et al. 2011. MiMIC: a highly versatile  
550 transposon insertion resource for engineering *Drosophila melanogaster* genes. *Nature*  
551 *Methods* 8(9), pp. 737–743.

552 Wang, L., Ryoo, H.D., Qi, Y. and Jasper, H. 2015. PERK limits drosophila lifespan by  
553 promoting intestinal stem cell proliferation in response to ER stress. *PLoS Genetics*  
554 11(5), p. e1005220.

555

556

557 **Figures**

# Figure 1

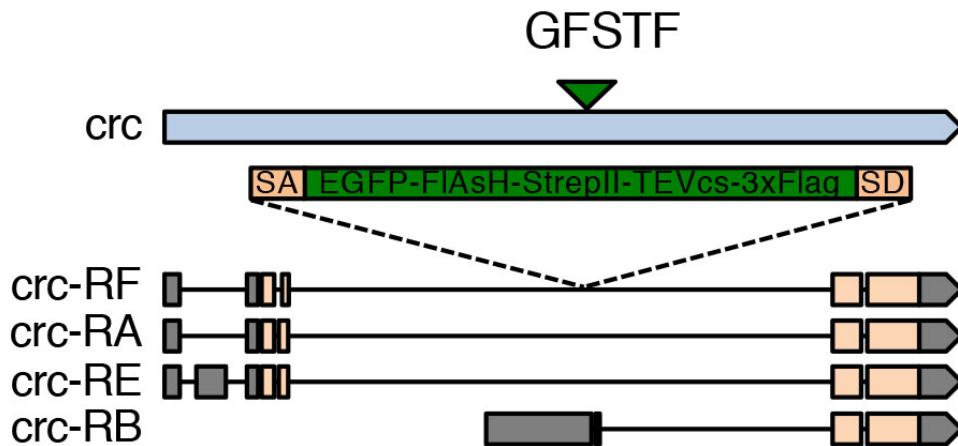

558

559 **Fig. 1. Schematic of the *crc* cytogenetic locus**

560 The *crc* gene (blue bar) is known to encode at least four splice variants *crc*-RA, -RB, -RE,  
561 and -RF. These splice isoforms vary in their 5' leader sequences (gray bars) and their  
562 coding exons (beige bars). MiMIC-mediated insertion of the GFSTF cassette in the  
563 genomic locus (green triangle) with a splice acceptor (SA) and splice donor (SD)  
564 sequences predicts the inclusion of a multi-tag exon (green box) in all the *crc* isoforms  
565 except *crc*-RB.

566

567

## Figure 2

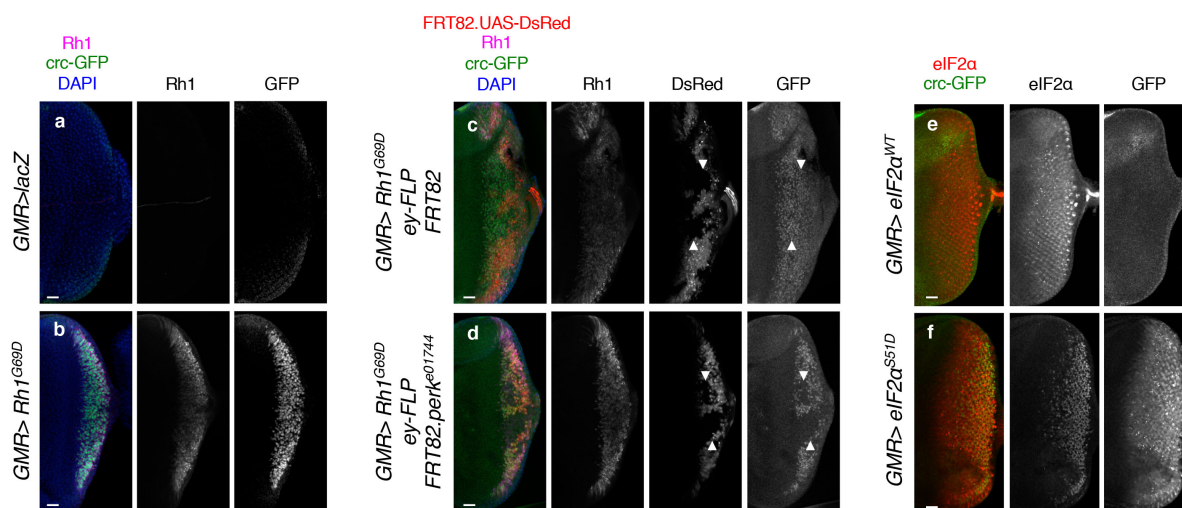

568

### 569 **Fig. 2. *crc*<sup>GFSTF</sup> is a reporter for *crc* activity in vivo**

570 a-b. Confocal images from eye imaginal discs from wandering third instar larva where  
571 *GMR-Gal4* drives the expression of either a control protein (*GMR>lacZ*) or mutant Rh1  
572 (*GMR>Rh1<sup>G69D</sup>*), in the *crc*<sup>GFSTF/+</sup> background. Here and in following images, the *crc*-GFP  
573 fusion protein was detected with anti-GFP (green), Rh1 was detected with 4C5 antibody  
574 (magenta), DAPI (blue) stains the nucleus. Rh1 and GFP single channels are shown  
575 separately in black and white; anterior is the left, posterior to the right; scale bars  
576 represent 25 μM.

577 c-d. Confocal images of eye imaginal discs misexpressing Rh1<sup>G69D</sup> (*GMR>Rh1<sup>G69D</sup>*)  
578 showing control clones (c, FRT82) and *Perk* mutant clones (d, *FRT82.perk<sup>e01744</sup>*)  
579 generated by eyeless-flippase (*ey-FLP*) in the *crc*<sup>GFSTF/+</sup> background. Clones are  
580 negatively marked with DsRed (red). This DsRed expression was also driven by *GMR>*  
581 (white arrowheads). Rh1, DsRed and GFP single channels are separately shown in black  
582 and white images. The absence of GFP in DsRed negative clones demonstrate the effect  
583 of loss of *Perk* on *crc*-GFP induction in response to Rh1<sup>G69D</sup>.

584 e-f. Confocal images of eye imaginal discs showing crc-GFP expression in response to  
585 wildtype eIF2 $\alpha$  (*eIF2 $\alpha$ <sup>WT</sup>*) or phospho-mimetic eIF2 $\alpha$  (*eIF2 $\alpha$ <sup>S51D</sup>*) ectopically expressed  
586 with *GMR-Gal4* (*GMR*>). Ectopic expression was confirmed by staining with anti-eIF2 $\alpha$   
587 (red). eIF2 $\alpha$  and GFP single channels are shown in black and white.

588

589

## Figure 3

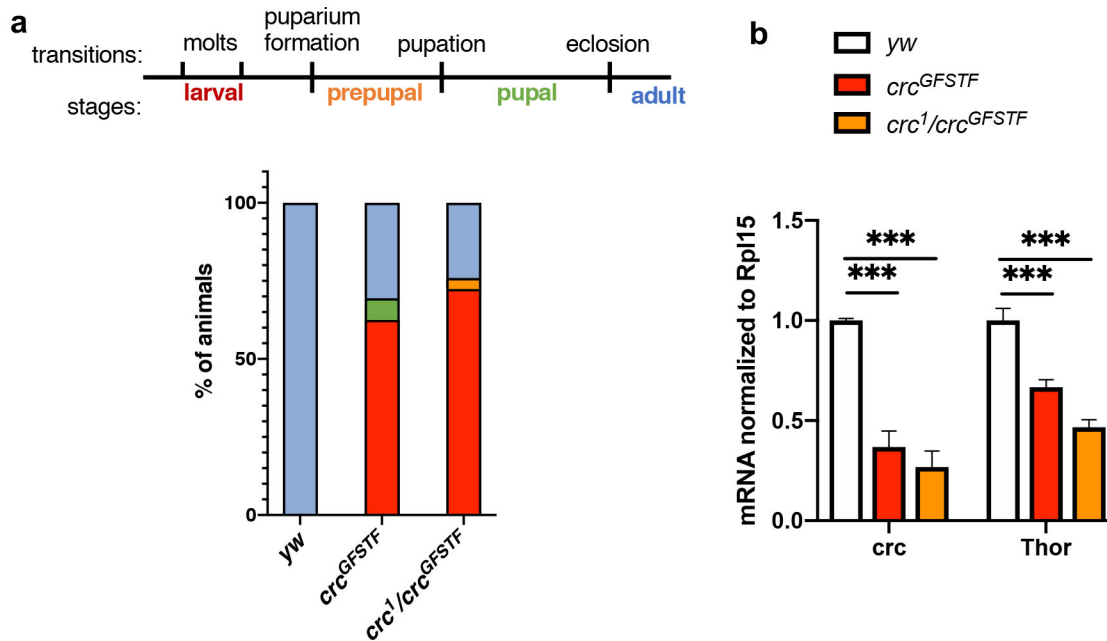

590

591 **Fig. 3.  $crc^{GFSTF}$  is a  $crc$  hypomorphic allele**

592 a. (Top) Schematic showing transitions and stages during *Drosophila* development.

593 (Bottom) Lethal phase analysis for control ( $yw$ ),  $crc^{GFSTF}$  homozygotes, and  
594 transheterozygotes ( $crc^{GFSTF}/crc^1$ ), color-coded per the schematic. n=100 for each  
595 genotype.

596 b. qPCR analysis of  $crc$  and its transcriptional target,  $Thor$ , normalized to  $Rpl15$  from  
597 wandering 3<sup>rd</sup> instar larval stages when  $crc$  expression is known to be elevated. Data  
598 represent the mean of 3 independent experiments, error bars represent standard error.

599 \*\*\*= p<0.0001 calculated by a paired two-tailed *t*-test.

600

601

## Figure 4

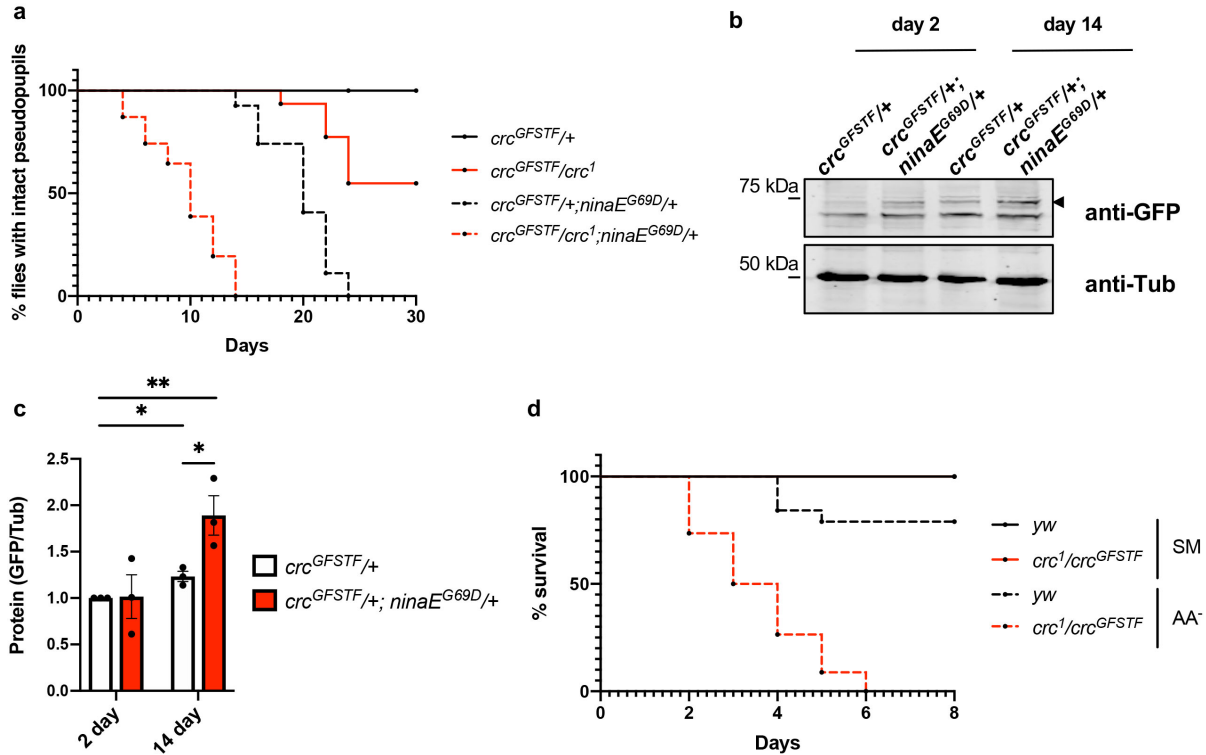

602

### 603 Fig. 4. *crc* mediates *Perk* and *Gcn2* phenotypes in adult animals

604 a. Time course of pseudopupil degeneration in control and *ninaE<sup>G69D</sup>/+* flies in *crc*  
 605 heterozygote (*crc<sup>GFSTF</sup>/+*) and transheterozygous mutants (*crc<sup>GFSTF</sup>/crc<sup>1</sup>*). The difference  
 606 in the course of retinal degeneration between the following pairs is statistically significant  
 607 as assessed by the Log-rank (Mantel-Cox) test ( $p < 0.001$ ): *crc<sup>GFSTF</sup>/+* and  
 608 *crc<sup>GFSTF</sup>/+; ninaE<sup>G69D</sup>/+*, *crc<sup>GFSTF</sup>/crc<sup>1</sup>* and *crc<sup>GFSTF</sup>/crc<sup>1</sup>; ninaE<sup>G69D</sup>/+*, and, *crc<sup>GFSTF</sup>/+* and  
 609 *crc<sup>GFSTF</sup>/crc<sup>1</sup>*. (n = 100).

610 b. Western blot analysis of fly head extracts from young (1-2 day) and aged (14-16 day)  
 611 old flies of the control and *ninaE<sup>G69D</sup>/+* animals also heterozygous for *crc<sup>GFSTF</sup>*. The upper  
 612 panel shows the blot probed with anti-GFP to detect the *crc*-GFP fusion protein  
 613 (distinguished by the black arrowhead) and lower panel shows Tubulin (anti-Tub) as a

614 loading control.

615 c. Quantification of western blotting data in (b) showing *crc*-GFP normalized to Tubulin.

616 Data represent the mean from three independent experiments, error bars represent

617 standard error. \*\*=  $p < 0.001$ , \*= $p < 0.01$  calculated by a paired two-tailed *t*-test.

618 d. Time course of survival rate of adult females of indicated genotypes when fed with

619 standard media (SM, solid lines) or amino acid deprived media (AA<sup>-</sup>, broken lines). Note

620 that the curves for the flies fed SM for *yw* (solid black) and *crc*<sup>GFSTF</sup>/*crc* (solid red) overlap

621 entirely. The difference in the survival rates between the following pairs is statistically

622 significant as assessed by the Log-rank (Mantel-Cox) test ( $p < 0.001$ ): *yw* (SM) and *yw*

623 (AA<sup>-</sup>), *crc*<sup>GFSTF</sup>/*crc* (SM) and *crc*<sup>GFSTF</sup>/*crc* (AA<sup>-</sup>), *yw* (AA<sup>-</sup>) and *crc*<sup>GFSTF</sup>/*crc* (AA<sup>-</sup>). (n = 100).

624

625

626

## Figure 5

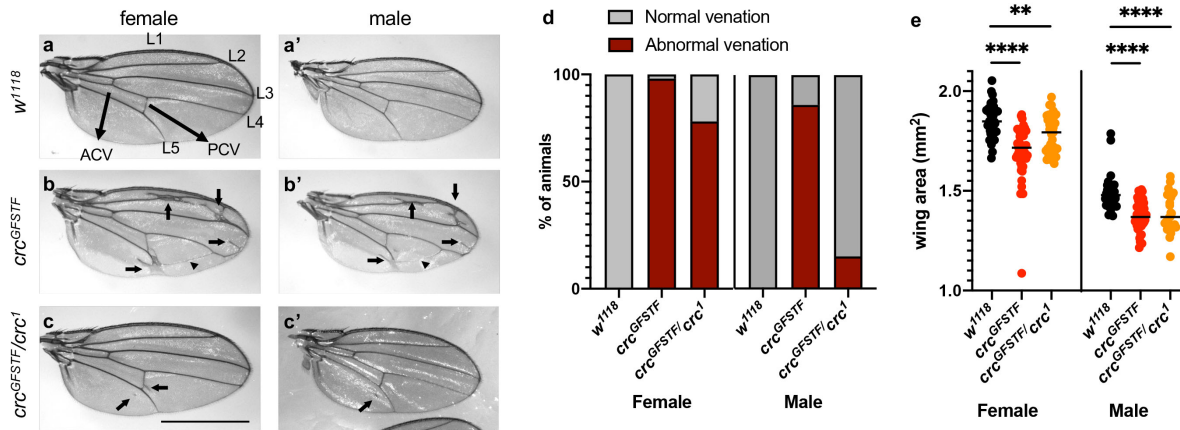

627

### 628 Fig. 5. Adult *crc* mutants display developmental defects in the wing

629 a-c. Grayscale images of the right wing from female (a-c) or male (a'-c') flies from the  
 630 indicated genotypes. (a) shows the arrangement of wing veins in control (*w<sup>1118</sup>*) flies with  
 631 L1-L5 marking longitudinal veins, and arrows marking the anterior cross vein (ACV) and  
 632 posterior cross vein (ACV). Ectopic longitudinal veins in *crc<sup>GFSTF</sup>* homozygotes and  
 633 *crc<sup>GFSTF</sup>/crc<sup>1</sup>* transheterozygotes (b, b', c, c') are marked by arrows and arrow heads point  
 634 to ectopic cross veins. Scale bar= 1000µm.

635 d. The penetrance of the ectopic vein phenotype in (a-c) quantified from 40 animals of  
 636 each sex of the indicated genotypes.

637 e. Area of the right wing from male and female flies of the indicated genotypes as  
 638 measured in ImageJ.  $n \geq 27$  for each genotype. Data represent the mean and error bars  
 639 represent standard error. \*\*=  $p < 0.001$ , \*\*\*\*=  $p < 0.00001$  calculated by an unpaired two-  
 640 tailed *t*-test.

641

642



## Figure 6

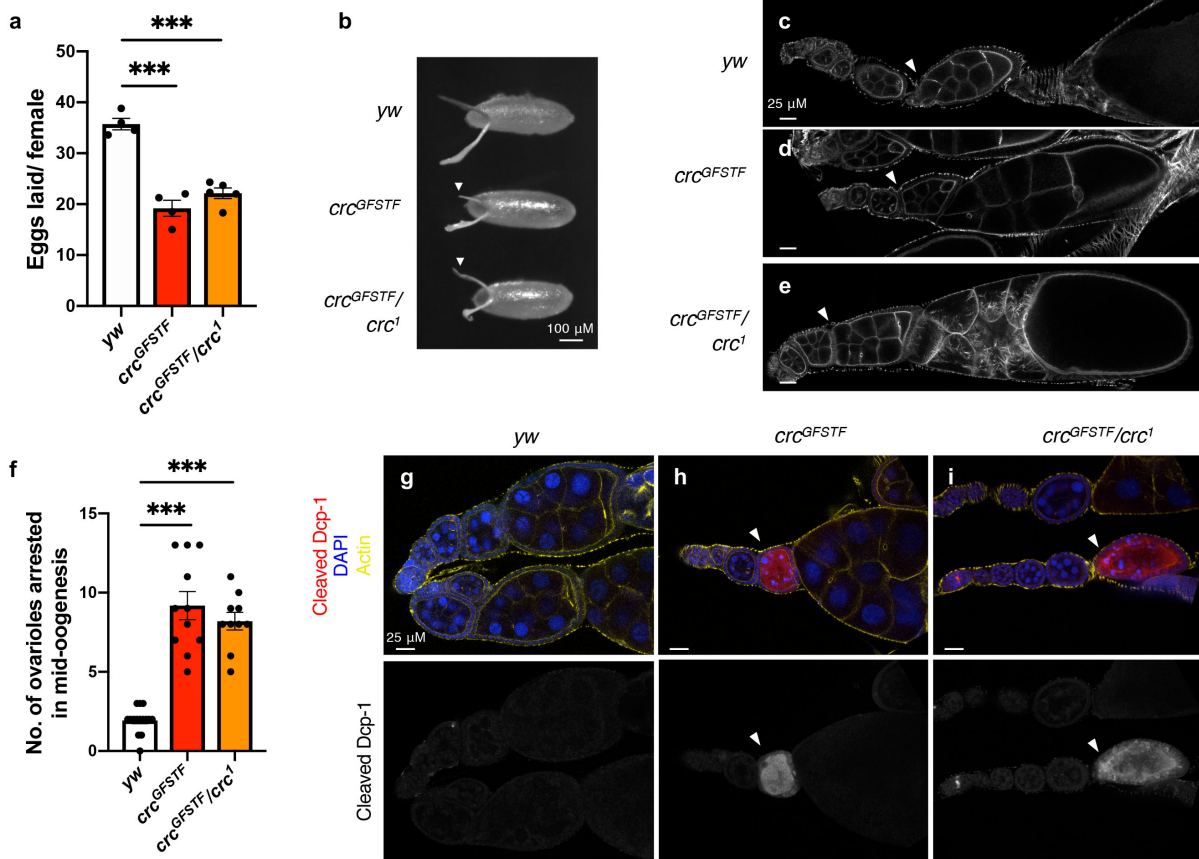

643

644 **Fig. 6. *crc* mutant females show reduced fertility due to a block in oogenesis**

645 a. Number of eggs laid per female in a 24-hour period for control (*yw*), and *crc* mutants.

646 The data are the mean from 4 independent experiments with five females per experiment,

647 error bars represent standard error. \*\*\*=  $p < 0.0001$ , calculated by a paired two-tailed *t*-

648 test.

649 b. Grayscale images of 0-24 hour eggs from females of the indicated genotypes. White

650 arrowheads indicate dorsal appendage defects in eggs laid by *crc* mutant females, in

651 comparison to well-formed and elongated dorsal appendages in eggs laid by control

652 females (*yw*).

653 c-e. Confocal images of individual ovarioles from indicated genotypes, counterstained

654 with phalloidin (actin). Control ovarioles (*yw*) show clearly delineated individual egg  
655 chambers (white arrowheads, c) that are appropriately sized for each stage. *crc* mutant  
656 ovarioles (*crc<sup>GFSTF</sup>*, *crc<sup>GFSTF</sup>/crc<sup>1</sup>*) show enlarged stage 10 egg chambers, with no clear  
657 delineation between individual egg chambers (white arrowheads, d-e) indicating a block  
658 in oogenesis.

659 f. The number of ovarioles per ovary showing enlarged stage 10 egg chambers, which  
660 are indicative of a mid-oogenesis arrest. Data represent the mean from individual ovaries  
661 of 11 animals, error bars represent standard error. \*\*\*=  $p < 0.0001$ , calculated by an  
662 unpaired two-tailed *t*-test.

663 g-i. Confocal images of ovaries from the indicated genotypes stained with the cell death  
664 marker cleaved Dcp-1 (red), nuclei counterstained with DAPI (blue) and phalloidin  
665 marking actin (yellow). White arrowheads point to egg chambers in *crc* mutant ovarioles  
666 (*crc<sup>GFSTF</sup>*, *crc<sup>GFSTF</sup>/crc<sup>1</sup>*) that show elevated Dcp-1 staining.
